# Supplementary material for: Self-assembly and photo-responsive behavior of bis-terpyridyl Eu3+-complex L1
Source: Royal Society of Chemistry journal article supplement (doi:10.1039/c9nj04252k), 2019-01-01
Supplement: c9nj04252k1.pdf [file c9nj04252k1.pdf]

## **Self-Assembly and Photo-Responsive Behavior of Bis-terpyridyl Eu<sup>3+</sup>-Complex**

Chuan Dong,<sup>a</sup> Jin Yuan,<sup>a</sup> Heinz Hoffmann<sup>b</sup> and Jingcheng Hao<sup>\*,a</sup>

<sup>a</sup> Key Laboratory of Colloid and Interface Chemistry & Key Laboratory of Special Aggregated Materials, Shandong University, Ministry of Education, Jinan 250100, China

<sup>b</sup> Physikalische Chemie I, Bayreuth Universität, D-95440, Germany

\* Corresponding author. Fax: +86-531-88564750. E-mail: [jhao@sdu.edu.cn](mailto:jhao@sdu.edu.cn)

6.1 Ref Ion Gate Position ToF2\_mix  
Confidence  
Data: DC-20180307-989.860001.H24[c] 7 Mar 2018 21:38 Cal: tof 25 Oct 2017 14:46  
Shimadzu Biotech Axima Confidence 2.9.3.20110624: Mode Reflectron, Power: 80, Blanked, P.Ext. @ 989 (bin 72)  
%Int. 2.4 mV[sum= 227 mV] Profiles 1-96 Unsmoothed

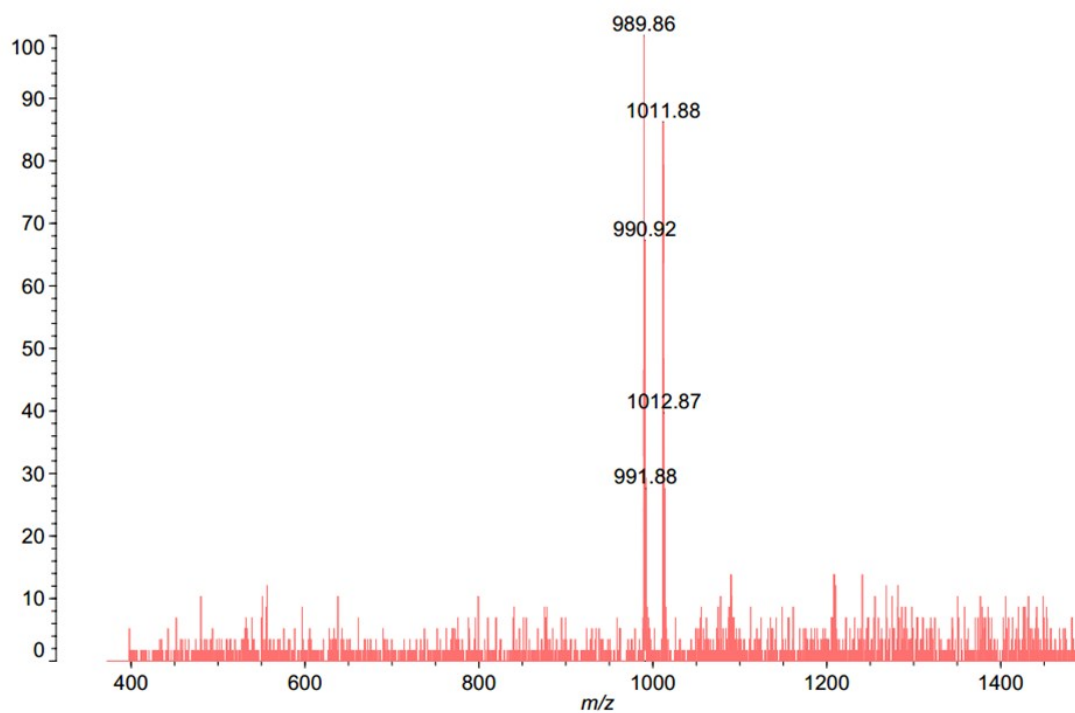

Figure S1. MALDI-TOF-MS spectrum of compound L1.

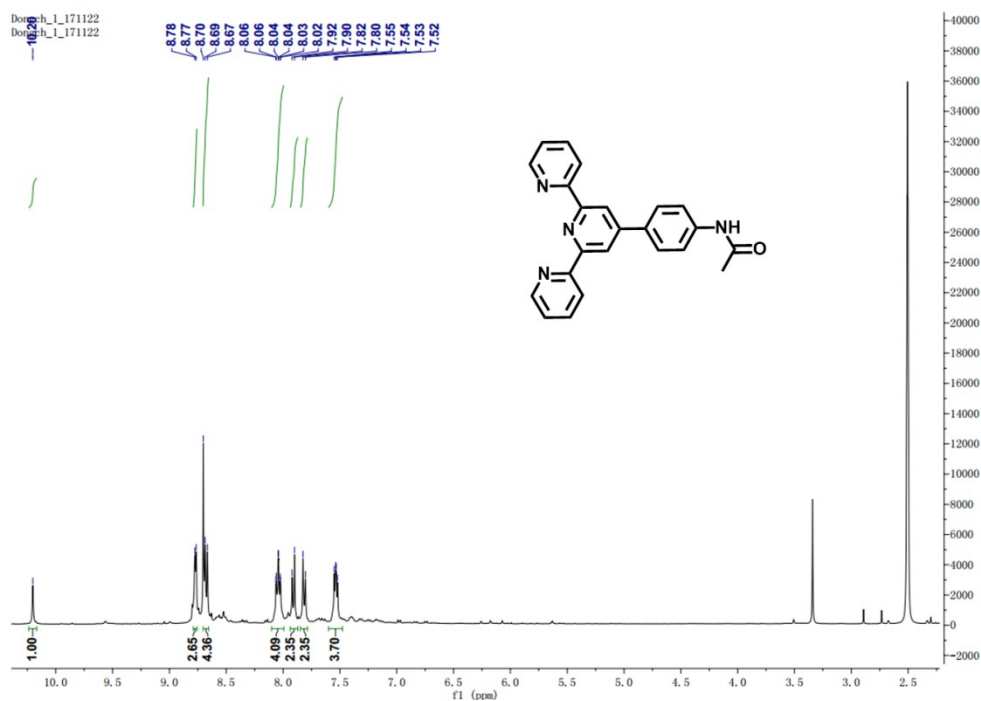

Figure S2. <sup>1</sup>H-NMR (400 MHz) spectrum of compound L2.

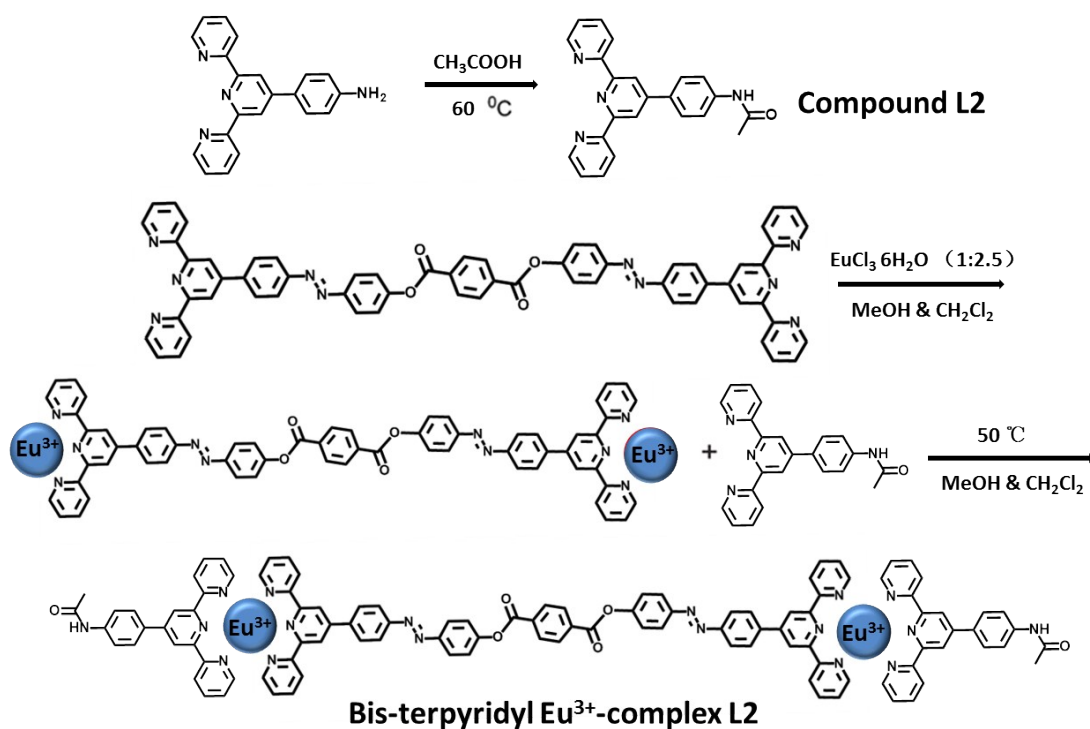

**Scheme S1.** Synthetic route of **compound L2** and **bis-terpyridyl  $\text{Eu}^{2+}$ -complex L2**.

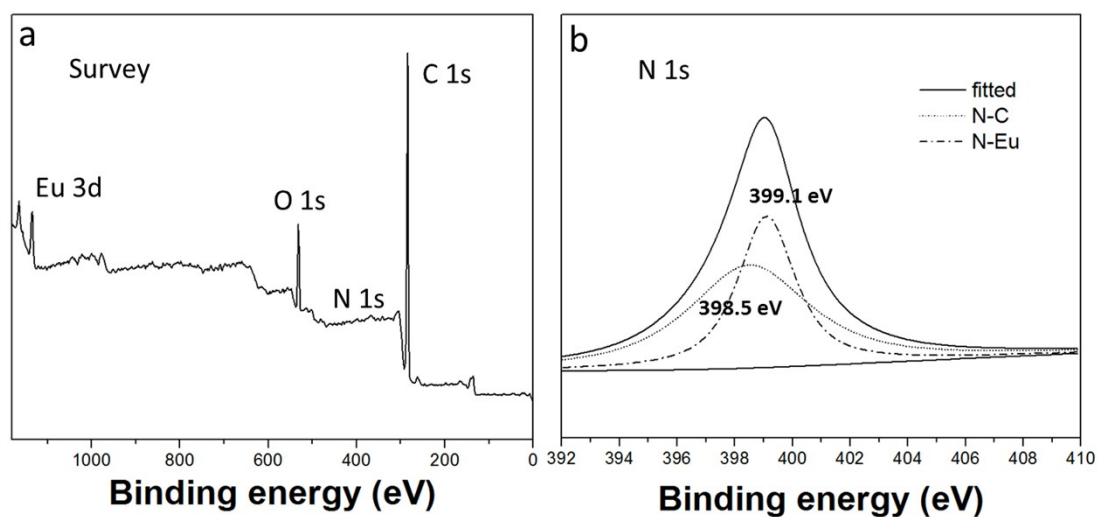

**Figure S3.** XPS analysis of **bis-terpyridyl  $\text{Eu}^{3+}$ -complex L1**. (a) Energy survey of spectrum. (b) High-resolution spectrum in the N1s.

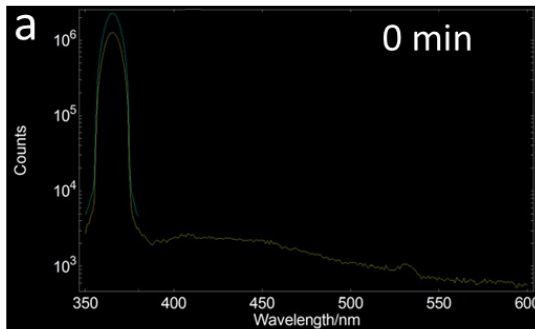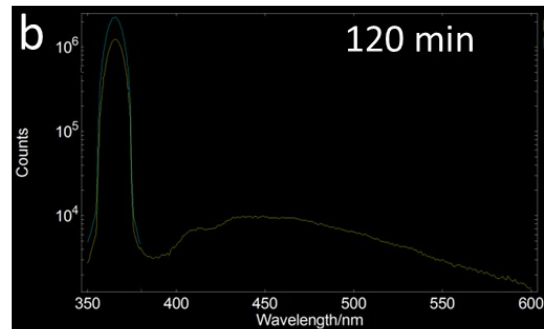

Quantum Yield Results  
for 'Multi Scans'

Excitation Range: 350.00 to 380.00 nm  
Luminescence Range: 380.00 to 600.00 nm

QY = 2.90%

Quantum Yield Results  
for 'Multi Scans'

Excitation Range: 350.00 to 380.00 nm  
Luminescence Range: 380.00 to 600.00 nm

QY = 10.57%

**Figure S4.** Fluorescence quantum yield of the solution before (a) and after (b) UV exposure of 120 minutes.

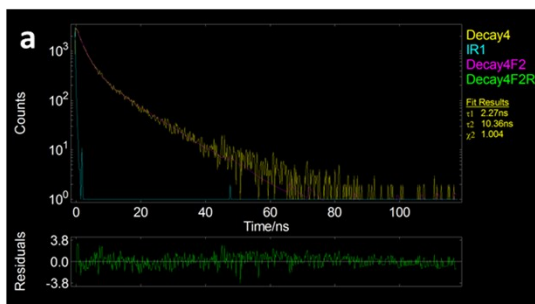

Fitting Result =  $2.2663 \times 55.73\% + 10.3565 \times 44.27\% = 5.84783154 \text{ ns}$

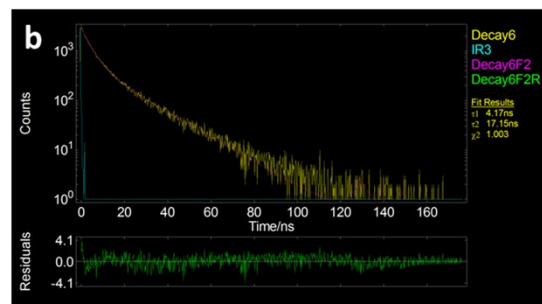

Fitting Result =  $4.1706 \times 56.14\% + 17.1539 \times 43.86\% = 9.86507538 \text{ ns}$

**Figure S5.** Short fluorescent life of the solution before (a) and after (b) UV exposure of 120 minutes.

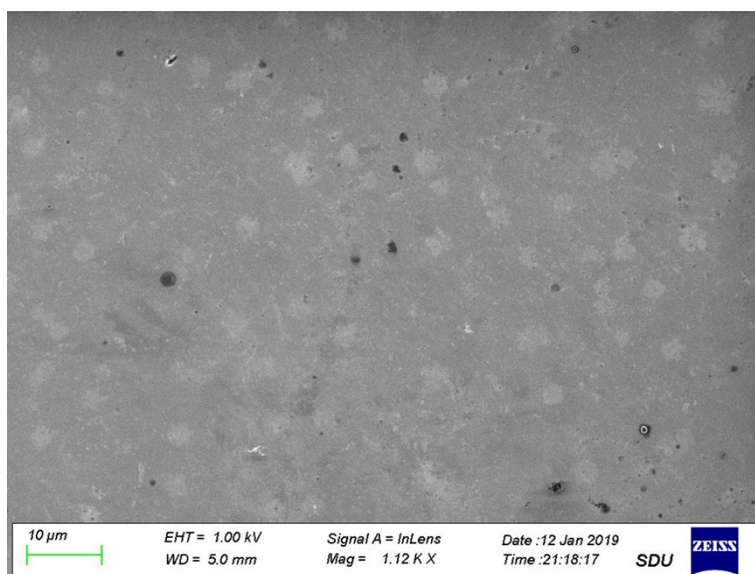

**Figure S6.** SEM images of **bis-terpyridyl Eu<sup>2+</sup>-complex L2** with no specific aggregates.

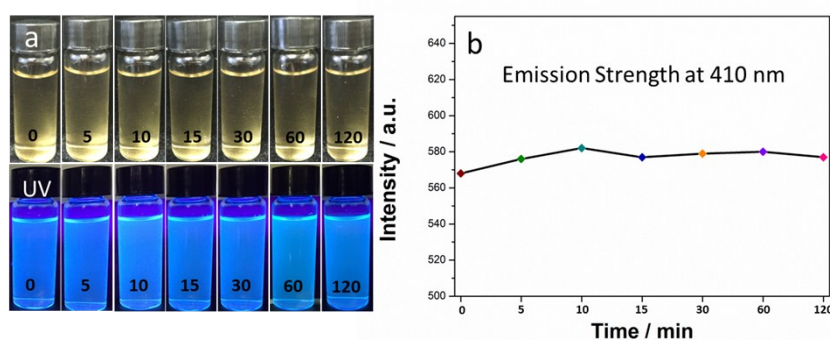

**Figure S7.** Fluorescence photographs and emission strength at 410 nm of the **bis-terpyridyl Eu<sup>2+</sup>-complex L2** solutions (0.2 mg/ml) after UV exposure of 0, 5, 15, 30, 60, 120 min.
